# Supplementary material
Source: publisher figshare collection journal article supplement (https://acs.figshare.com/ndownloader/files/13699151)
Supplement: Supplementary file 1 [file 13699151]

## Supporting Information

### Radiolysis Induced Formation of Hollow RbBr Nanocubes under Electron Beam Irradiation

*Linyuan Lian<sup>1</sup>, Feng Cheng<sup>2</sup>, Yong Xia<sup>1</sup>, Moyan Zheng<sup>1</sup>, Jiangping Ke<sup>1</sup>, Weizhuo Zhang<sup>1</sup>, Huan Liu<sup>1</sup>, Daoli Zhang<sup>1</sup>, Jianbo Gao<sup>3</sup>, Jiang Tang<sup>2</sup>, Luying Li<sup>2</sup>, Manlin Tan<sup>4\*</sup> and Jianbing Zhang<sup>1,5\*</sup>*

<sup>1</sup>School of Optical and Electronic Information, Engineering Research Center for Functional Ceramics, Ministry of Education, Huazhong University of Science and Technology, 1037 Luoyu Road, Wuhan, Hubei 430074, China

<sup>2</sup>Wuhan National Laboratory for Optoelectronics, Huazhong University of Science and Technology, Wuhan, Hubei 430074, China

<sup>3</sup>Department of Physics and Astronomy, Clemson University, South Carolina 29634, United States

<sup>4</sup>Research Institute of Tsinghua University in Shenzhen, Shenzhen, Guangdong 518057, China

<sup>5</sup>Shenzhen Huazhong University of Science and Technology Research Institute, Shenzhen, Guangdong 518057, China

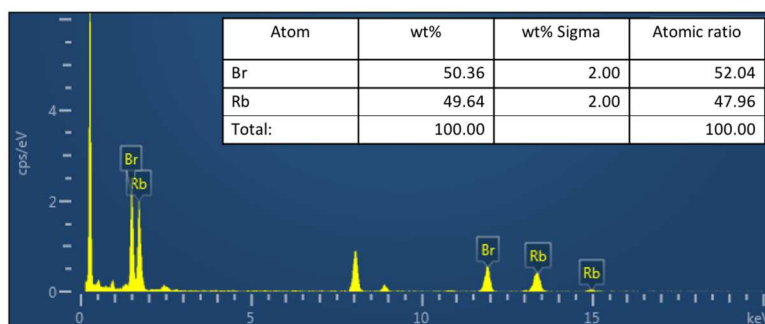

Figure S1. The energy-dispersive X-ray spectroscopy result of the hollow RbBr nanocubes.

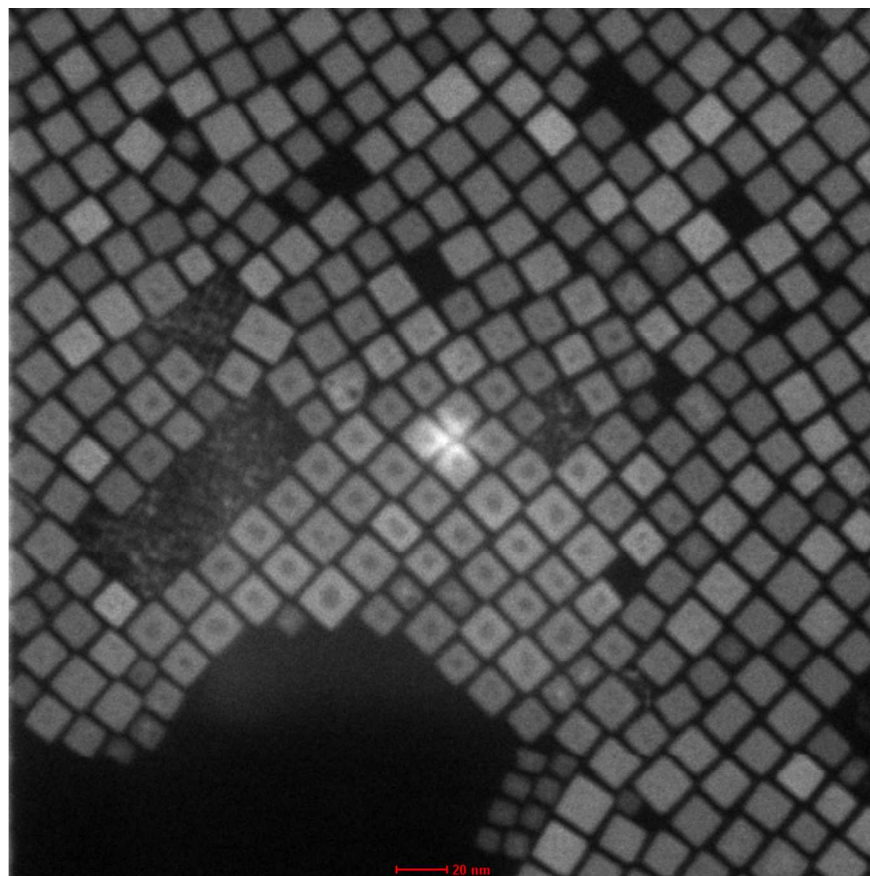

Figure S2. The HAADF image of the RbBr nanocubes showing voids only appeared in the area with focused e-beam.
